# Supplementary material for: High Throughput Fluorescence-Based In Vitro Experimental Platform for the Identification of Effective Therapies to Overcome Tumour Microenvironment-Mediated Drug Resistance in AML
Source: MDPI journal article supplement (doi:10.3390/cancers15071988), 2023-03-27
Supplement: s1 [file s1]

**Supplementary Table S6: Correlation indexes of the co-expression of CRM1 and TARGET genes (R > 0.2; R < - 0.2) with a significant statistically significant value ( $p \leq 0.05$ ) in all analysed tumour databases.** The column on the right shows the average correlation value of the databases studied.

|                | All tumours |       |          |            |        |         |
|----------------|-------------|-------|----------|------------|--------|---------|
|                | Breast      | Lung  | Prostate | Colorectal | AML    | Average |
| <i>MSH2</i>    | 0,259       | 0,622 | 0,460    | 0,353      | 0,642  | 0,467   |
| <i>ATR</i>     | 0,188       | 0,532 | 0,297    | 0,382      | 0,554  | 0,391   |
| <i>MSH6</i>    | 0,329       | 0,600 | 0,210    | 0,249      | 0,505  | 0,379   |
| <i>BRCA1</i>   | 0,152       | 0,403 | 0,088    | 0,371      | 0,536  | 0,310   |
| <i>EZH2</i>    | 0,339       | 0,523 | 0,084    | 0,356      | 0,151  | 0,291   |
| <i>BRCA2</i>   | 0,168       | 0,488 | 0,053    | 0,333      | 0,242  | 0,257   |
| <i>AURKA</i>   | 0,276       | 0,477 | -0,016   | 0,271      | 0,259  | 0,254   |
| <i>NPM1</i>    | 0,103       | 0,200 | 0,123    | 0,272      | 0,354  | 0,210   |
| <i>RB1</i>     | 0,000       | 0,124 | 0,423    | 0,091      | 0,313  | 0,190   |
| <i>NRAS</i>    | 0,096       | 0,423 | 0,179    | 0,116      | 0,070  | 0,177   |
| <i>NF1</i>     | 0,000       | 0,152 | 0,221    | 0,113      | 0,359  | 0,169   |
| <i>MLH1</i>    | 0,000       | 0,126 | 0,211    | 0,049      | 0,439  | 0,165   |
| <i>BRAF</i>    | 0,060       | 0,282 | 0,219    | 0,243      | -0,047 | 0,151   |
| <i>PIK3CB</i>  | 0,044       | 0,284 | 0,172    | 0,111      | 0,136  | 0,149   |
| <i>CDK12</i>   | 0,000       | 0,274 | 0,160    | 0,246      | 0,043  | 0,144   |
| <i>ATM</i>     | 0,000       | 0,117 | 0,360    | 0,142      | 0,101  | 0,144   |
| <i>IDH1</i>    | 0,000       | 0,256 | 0,096    | 0,067      | 0,290  | 0,142   |
| <i>PIK3CA</i>  | 0,000       | 0,459 | 0,234    | 0,053      | -0,077 | 0,134   |
| <i>SMAD4</i>   | 0,046       | 0,152 | 0,114    | 0,029      | 0,285  | 0,125   |
| <i>CCNE1</i>   | 0,161       | 0,354 | -0,105   | 0,202      | 0,000  | 0,122   |
| <i>CDK4</i>    | 0,056       | 0,074 | 0,045    | 0,121      | 0,286  | 0,116   |
| <i>DNMT3A</i>  | 0,120       | 0,240 | 0,039    | 0,000      | 0,155  | 0,111   |
| <i>MYC</i>     | 0,000       | 0,000 | 0,148    | 0,156      | 0,219  | 0,104   |
| <i>ASXL1</i>   | 0,050       | 0,174 | 0,061    | 0,232      | 0,000  | 0,103   |
| <i>CTNNB1</i>  | 0,000       | 0,094 | 0,334    | 0,203      | -0,139 | 0,098   |
| <i>PTEN</i>    | -0,046      | 0,121 | 0,103    | 0,035      | 0,278  | 0,098   |
| <i>CDK6</i>    | 0,000       | 0,058 | -0,135   | 0,040      | 0,518  | 0,096   |
| <i>MED12</i>   | 0,000       | 0,137 | 0,069    | 0,036      | 0,226  | 0,093   |
| <i>MDM4</i>    | 0,000       | 0,000 | 0,251    | 0,100      | 0,111  | 0,092   |
| <i>SMAD2</i>   | 0,000       | 0,108 | 0,190    | -0,047     | 0,208  | 0,092   |
| <i>EWSR1</i>   | 0,000       | 0,073 | 0,066    | 0,187      | 0,100  | 0,085   |
| <i>SMARCA4</i> | 0,000       | 0,000 | 0,000    | 0,107      | 0,297  | 0,081   |
| <i>MAP2K4</i>  | 0,000       | 0,184 | 0,116    | -0,076     | 0,170  | 0,079   |
| <i>KRAS</i>    | 0,055       | 0,171 | 0,207    | 0,039      | -0,089 | 0,077   |
| <i>GNAQ</i>    | 0,000       | 0,000 | 0,200    | -0,103     | 0,255  | 0,070   |
| <i>BRD3</i>    | 0,000       | 0,075 | -0,022   | 0,025      | 0,266  | 0,069   |
| <i>MEN1</i>    | 0,000       | 0,087 | -0,092   | 0,016      | 0,329  | 0,068   |
| <i>CRKL</i>    | 0,000       | 0,132 | 0,109    | -0,036     | 0,135  | 0,068   |
| <i>IDH2</i>    | 0,042       | 0,068 | 0,068    | -0,035     | 0,190  | 0,067   |
| <i>RHEB</i>    | 0,124       | 0,083 | 0,118    | 0,109      | -0,135 | 0,060   |

|                 |        |        |        |        |        |        |
|-----------------|--------|--------|--------|--------|--------|--------|
| <b>NOTCH2</b>   | 0,000  | 0,061  | 0,273  | -0,036 | 0,000  | 0,060  |
| <b>GNAS</b>     | 0,051  | 0,068  | 0,063  | 0,111  | 0,005  | 0,060  |
| <b>TP53</b>     | 0,000  | -0,055 | 0,000  | 0,000  | 0,347  | 0,058  |
| <b>MAPK1</b>    | 0,000  | 0,135  | 0,177  | -0,025 | 0,000  | 0,057  |
| <b>MTOR</b>     | 0,000  | -0,032 | -0,050 | 0,065  | 0,280  | 0,053  |
| <b>CDKN1B</b>   | 0,000  | 0,097  | 0,171  | 0,121  | -0,131 | 0,052  |
| <b>JAK2</b>     | 0,000  | 0,006  | 0,166  | 0,030  | 0,000  | 0,040  |
| <b>ETV6</b>     | 0,044  | 0,055  | 0,046  | -0,064 | 0,104  | 0,037  |
| <b>PIK3R1</b>   | -0,042 | -0,070 | 0,154  | 0,000  | 0,119  | 0,032  |
| <b>APC</b>      | -0,055 | 0,057  | 0,197  | -0,040 | 0,001  | 0,032  |
| <b>FBXW7</b>    | 0,000  | -0,066 | 0,369  | 0,120  | -0,286 | 0,027  |
| <b>TSC1</b>     | 0,000  | -0,003 | 0,018  | 0,120  | 0,000  | 0,027  |
| <b>KIT</b>      | -0,052 | -0,072 | 0,052  | -0,076 | 0,254  | 0,021  |
| <b>MET</b>      | 0,000  | 0,000  | 0,052  | 0,051  | 0,000  | 0,021  |
| <b>ERBB2</b>    | 0,000  | 0,090  | -0,139 | -0,036 | 0,188  | 0,021  |
| <b>ZNRF3</b>    | 0,000  | 0,000  | -0,064 | 0,000  | 0,166  | 0,020  |
| <b>RAF1</b>     | 0,000  | 0,198  | 0,161  | 0,233  | -0,494 | 0,020  |
| <b>CDKN2A</b>   | 0,000  | 0,163  | -0,100 | 0,034  | 0,000  | 0,019  |
| <b>VHL</b>      | -0,045 | 0,074  | 0,175  | 0,086  | -0,200 | 0,018  |
| <b>CDH1</b>     | 0,000  | 0,000  | 0,083  | 0,000  | 0,000  | 0,017  |
| <b>BRD2</b>     | 0,000  | 0,060  | 0,143  | 0,031  | -0,165 | 0,014  |
| <b>RNF43</b>    | 0,000  | 0,060  | -0,068 | 0,076  | 0,000  | 0,014  |
| <b>MAP3K1</b>   | -0,062 | 0,000  | 0,189  | -0,065 | 0,000  | 0,012  |
| <b>MDM2</b>     | 0,000  | -0,062 | 0,150  | -0,031 | -0,020 | 0,007  |
| <b>TET2</b>     | 0,000  | 0,000  | 0,213  | -0,068 | -0,119 | 0,005  |
| <b>PTCH1</b>    | 0,000  | 0,000  | 0,089  | 0,036  | -0,103 | 0,004  |
| <b>FGFR3</b>    | 0,000  | 0,000  | -0,104 | 0,000  | 0,117  | 0,003  |
| <b>SYK</b>      | 0,000  | -0,071 | 0,040  | 0,034  | 0,000  | 0,001  |
| <b>c15orf55</b> | 0,000  | 0,000  | 0,000  | 0,000  | 0,000  | 0,000  |
| <b>FLCN</b>     | 0,045  | 0,096  | 0,000  | 0,032  | -0,180 | -0,001 |
| <b>ERCC2</b>    | 0,000  | -0,122 | -0,134 | -0,036 | 0,283  | -0,002 |
| <b>NF2</b>      | -0,042 | 0,047  | 0,001  | -0,039 | 0,000  | -0,007 |
| <b>FLT3</b>     | 0,000  | -0,301 | -0,026 | -0,035 | 0,328  | -0,007 |
| <b>RUNX1</b>    | -0,046 | -0,218 | -0,048 | -0,068 | 0,337  | -0,009 |
| <b>MLL</b>      | 0,000  | 0,000  | 0,000  | -0,046 | 0,000  | -0,009 |
| <b>BCL2</b>     | 0,000  | -0,181 | 0,000  | -0,188 | 0,321  | -0,010 |
| <b>CCND2</b>    | 0,000  | -0,249 | 0,196  | 0,000  | 0,000  | -0,011 |
| <b>ETV5</b>     | 0,000  | -0,055 | 0,000  | 0,000  | 0,000  | -0,011 |
| <b>PDGFRA</b>   | -0,057 | -0,146 | 0,209  | -0,075 | 0,000  | -0,014 |
| <b>EGFR</b>     | 0,045  | -0,066 | -0,050 | 0,000  | 0,000  | -0,014 |
| <b>SMARCB1</b>  | 0,000  | 0,100  | -0,260 | -0,061 | 0,148  | -0,015 |
| <b>ERRFI1</b>   | 0,040  | 0,000  | 0,049  | 0,000  | -0,170 | -0,016 |
| <b>IGF1R</b>    | 0,000  | 0,000  | -0,085 | 0,000  | 0,000  | -0,017 |
| <b>NOTCH1</b>   | 0,000  | -0,059 | 0,035  | 0,046  | -0,110 | -0,018 |
| <b>AKT1</b>     | -0,103 | 0,085  | -0,050 | 0,035  | -0,062 | -0,019 |
|                 |        |        |        |        | 0,000  | -0,020 |

|                |        |        |        |        |        |        |
|----------------|--------|--------|--------|--------|--------|--------|
| <i>ETV4</i>    | 0,000  | -0,060 | -0,095 | 0,040  | 0,000  | -0,023 |
| <i>EPHA3</i>   | -0,054 | -0,056 | 0,066  | -0,081 | 0,000  | -0,025 |
| <i>CREBBP</i>  | 0,063  | 0,059  | 0,143  | 0,000  | -0,404 | -0,028 |
| <i>ETV1</i>    | -0,051 | -0,128 | 0,000  | 0,034  | 0,000  | -0,029 |
| <i>KDR</i>     | -0,044 | -0,120 | 0,054  | -0,050 | 0,000  | -0,032 |
| <i>MAP2K1</i>  | 0,000  | 0,066  | 0,065  | 0,023  | -0,323 | -0,034 |
| <i>AKT3</i>    | -0,061 | -0,056 | 0,114  | -0,048 | -0,120 | -0,034 |
| <i>BRD4</i>    | 0,000  | -0,089 | -0,001 | 0,067  | -0,152 | -0,035 |
| <i>TSC2</i>    | -0,042 | -0,058 | 0,045  | -0,126 | -0,003 | -0,037 |
| <i>DDR2</i>    | -0,154 | -0,170 | 0,253  | -0,118 | 0,000  | -0,038 |
| <i>WT1</i>     | 0,000  | -0,095 | -0,099 | 0,000  | 0,000  | -0,039 |
| <i>RET</i>     | 0,000  | 0,000  | -0,046 | -0,033 | -0,116 | -0,039 |
| <i>ALK</i>     | 0,051  | -0,086 | -0,111 | -0,072 | 0,000  | -0,044 |
| <i>CCND1</i>   | -0,156 | -0,051 | -0,056 | 0,034  | 0,000  | -0,046 |
| <i>ERBB3</i>   | -0,041 | 0,000  | -0,198 | 0,000  | 0,000  | -0,048 |
| <i>NKX2-1</i>  | 0,000  | -0,118 | -0,091 | -0,034 | 0,000  | -0,049 |
| <i>ESR1</i>    | 0,000  | -0,213 | 0,066  | -0,098 | 0,000  | -0,049 |
| <i>SMO</i>     | 0,000  | -0,020 | -0,230 | 0,000  | 0,000  | -0,050 |
| <i>MCL1</i>    | 0,000  | -0,088 | 0,136  | -0,080 | -0,219 | -0,050 |
| <i>AR</i>      | -0,044 | -0,116 | 0,007  | -0,101 | 0,000  | -0,051 |
| <i>MPL</i>     | 0,000  | -0,170 | 0,000  | -0,092 | 0,000  | -0,053 |
| <i>TMPRSS2</i> | 0,000  | -0,163 | -0,125 | 0,000  | 0,000  | -0,058 |
| <i>MITF</i>    | -0,172 | -0,066 | 0,035  | -0,087 | 0,000  | -0,058 |
| <i>RSPO2</i>   | 0,000  | -0,165 | -0,040 | -0,089 | 0,000  | -0,059 |
| <i>ERBB4</i>   | 0,000  | -0,206 | -0,054 | -0,042 | 0,000  | -0,060 |
| <i>CEBPA</i>   | -0,040 | -0,194 | -0,195 | 0,000  | 0,110  | -0,064 |
| <i>HRAS</i>    | 0,000  | 0,120  | -0,270 | 0,063  | -0,240 | -0,065 |
| <i>STK11</i>   | 0,000  | -0,183 | -0,127 | -0,036 | -0,016 | -0,072 |
| <i>FGFR2</i>   | 0,000  | -0,140 | 0,000  | -0,236 | 0,000  | -0,075 |
| <i>CDKN2B</i>  | 0,000  | -0,144 | -0,123 | -0,154 | 0,000  | -0,084 |
| <i>AKT2</i>    | -0,042 | -0,063 | -0,119 | 0,000  | -0,198 | -0,085 |
| <i>MYD88</i>   | 0,000  | -0,085 | 0,042  | -0,073 | -0,324 | -0,088 |
| <i>FGFR1</i>   | -0,048 | -0,075 | -0,142 | -0,087 | -0,102 | -0,091 |
| <i>PDGFRB</i>  | -0,216 | -0,340 | 0,133  | -0,047 | 0,000  | -0,094 |
| <i>BAP1</i>    | 0,000  | -0,064 | -0,107 | 0,000  | -0,310 | -0,096 |
| <i>NFKBIA</i>  | 0,000  | 0,000  | -0,039 | -0,062 | -0,455 | -0,111 |
| <i>ERG</i>     | -0,104 | -0,358 | -0,042 | -0,056 | 0,000  | -0,112 |
| <i>RAB35</i>   | 0,040  | -0,123 | 0,000  | -0,077 | -0,406 | -0,113 |
| <i>GNA11</i>   | -0,099 | -0,291 | 0,049  | -0,102 | -0,135 | -0,116 |
| <i>NTRK3</i>   | 0,000  | -0,434 | -0,037 | -0,143 | 0,000  | -0,123 |
| <i>CCND3</i>   | 0,000  | -0,146 | -0,292 | 0,000  | -0,209 | -0,129 |
| <i>JAK3</i>    | 0,000  | -0,222 | -0,179 | -0,117 | -0,151 | -0,134 |
| <i>MAP2K2</i>  | -0,056 | 0,112  | -0,288 | -0,162 | -0,342 | -0,147 |
| <i>ARAF</i>    | -0,126 | -0,137 | -0,085 | 0,000  | -0,432 | -0,156 |
| <i>MAPK3</i>   | -0,052 | -0,184 | -0,048 | -0,246 | -0,529 | -0,212 |
|                |        |        |        |        | -0,379 | -0,217 |
