# Supplementary material for: High Throughput Fluorescence-Based In Vitro Experimental Platform for the Identification of Effective Therapies to Overcome Tumour Microenvironment-Mediated Drug Resistance in AML
Source: MDPI journal article supplement (doi:10.3390/cancers15071988), 2023-03-27
Supplement: s1 [file s1]

**Supplementary Table S4: Correlation indexes of the co-expression of CRM1 and TARGET genes ( $R > 0.2$ ;  $R < -0.2$ ) with a significant statistically significant value ( $p \leq 0.05$ ) in analysed colorectal carcinoma primary tumours databases. The column on the right shows the average correlation value of the databases studied.**

|                | Colorectal Primary Tumours |          |        |       |        |         |       | Average |
|----------------|----------------------------|----------|--------|-------|--------|---------|-------|---------|
|                | Colon-omics                | Jorissen | Kemper | Laibe | Marisa | Roepman | TCGA  |         |
| <i>ATR</i>     | 0,387                      | 0,201    | 0,404  | 0,369 | 0,572  | 0,354   | 0,389 | 0,382   |
| <i>BRCA1</i>   | 0,554                      |          | 0,275  | 0,405 | 0,452  | 0,388   | 0,521 | 0,371   |
| <i>EZH2</i>    | 0,458                      |          | 0,325  | 0,481 | 0,468  | 0,373   | 0,389 | 0,356   |
| <i>MSH2</i>    | 0,573                      |          | 0,276  | 0,211 | 0,433  | 0,466   | 0,509 | 0,353   |
| <i>BRCA2</i>   | 0,599                      |          | 0,261  | 0,445 | 0,528  |         | 0,5   | 0,333   |
| <i>NPM1</i>    | 0,486                      |          | 0,312  | 0,269 | 0,35   | 0,215   | 0,27  | 0,272   |
| <i>AURKA</i>   | 0,448                      |          |        | 0,373 | 0,349  | 0,296   | 0,433 | 0,271   |
| <i>MSH6</i>    | 0,592                      |          |        |       | 0,356  | 0,277   | 0,521 | 0,249   |
| <i>CDK12</i>   | 0,429                      | 0,286    |        | 0,289 | 0,385  |         | 0,331 | 0,246   |
| <i>BRAF</i>    |                            | 0,201    |        | 0,366 | 0,518  |         | 0,613 | 0,243   |
| <i>RAF1</i>    |                            | 0,301    | 0,427  | 0,501 | 0,405  |         |       | 0,233   |
| <i>ASXL1</i>   |                            | 0,337    | 0,352  | 0,507 | 0,429  |         |       | 0,232   |
| <i>CTNNB1</i>  | 0,4                        | 0,228    |        | 0,214 | 0,231  | 0,345   |       | 0,203   |
| <i>CCNE1</i>   | 0,294                      | 0,209    |        | 0,324 |        | 0,257   | 0,33  | 0,202   |
| <i>EWSR1</i>   | 0,4                        |          |        | 0,437 | 0,221  | 0,25    |       | 0,187   |
| <i>MYC</i>     | 0,496                      |          |        | 0,333 |        |         | 0,26  | 0,156   |
| <i>ATM</i>     |                            |          | 0,245  | 0,227 | 0,272  |         | 0,247 | 0,142   |
| <i>CDK4</i>    | 0,292                      |          |        | 0,278 |        |         | 0,278 | 0,121   |
| <i>CDKN1B</i>  | 0,273                      |          |        | 0,276 | 0,296  |         |       | 0,121   |
| <i>FBXW7</i>   |                            |          |        | 0,253 | 0,365  | 0,224   |       | 0,120   |
| <i>TSC1</i>    |                            | 0,252    |        | 0,283 | 0,306  |         |       | 0,120   |
| <i>NRAS</i>    | 0,267                      |          |        |       | 0,251  | 0,297   |       | 0,116   |
| <i>NF1</i>     | 0,235                      |          |        | 0,273 |        |         | 0,286 | 0,113   |
| <i>GNAS</i>    |                            |          | 0,234  | 0,272 | 0,273  |         |       | 0,111   |
| <i>PIK3CB</i>  | 0,259                      |          |        |       | 0,306  | 0,212   |       | 0,111   |
| <i>RHEB</i>    |                            |          | 0,298  |       | 0,226  | 0,242   |       | 0,109   |
| <i>SMARCA4</i> | 0,399                      |          |        | 0,347 |        |         |       | 0,107   |
| <i>MDM4</i>    |                            |          |        | 0,361 | 0,341  |         |       | 0,100   |
| <i>RB1</i>     | 0,329                      |          |        |       | 0,305  |         |       | 0,091   |
| <i>VHL</i>     | 0,288                      |          |        |       |        |         | 0,312 | 0,086   |
| <i>RNF43</i>   | 0,206                      |          |        | 0,325 |        |         |       | 0,076   |
| <i>IDH1</i>    | 0,261                      |          |        |       |        | 0,211   |       | 0,067   |
| <i>BRD4</i>    | 0,268                      |          |        | 0,2   |        |         |       | 0,067   |
| <i>MTOR</i>    | 0,216                      |          | 0,238  |       |        |         |       | 0,065   |
| <i>HRAS</i>    | 0,202                      |          |        |       |        | 0,239   |       | 0,063   |
| <i>PIK3CA</i>  |                            |          |        |       | 0,368  |         |       | 0,053   |
| <i>MET</i>     | 0,36                       |          |        |       |        |         |       | 0,051   |
| <i>MLH1</i>    | 0,346                      |          |        |       |        |         |       | 0,049   |
| <i>NOTCH1</i>  |                            |          |        | 0,321 |        |         |       | 0,046   |
| <i>ETV4</i>    |                            |          |        | 0,281 |        |         |       | 0,040   |
| <i>CDK6</i>    |                            |          |        |       | 0,277  |         |       | 0,040   |

|                 |        |        |       |        |        |
|-----------------|--------|--------|-------|--------|--------|
| <b>KRAS</b>     |        |        | 0,271 |        | 0,039  |
| <b>MED12</b>    |        |        |       |        | 0,036  |
|                 |        | 0,251  |       |        |        |
| <b>PTCH1</b>    |        | 0,268  |       |        | 0,036  |
|                 | -0,221 |        | 0,202 |        |        |
| <b>PTEN</b>     |        |        | 0,247 |        | 0,035  |
| <b>AKT1</b>     |        |        |       |        | 0,035  |
|                 |        |        |       | 0,246  |        |
| <b>CDKN2A</b>   |        |        |       | 0,238  | 0,034  |
| <b>ETV1</b>     |        |        |       | 0,238  | 0,034  |
| <b>SYK</b>      |        |        |       | -0,241 | 0,034  |
|                 |        | 0,273  | 0,206 |        |        |
| <b>CCND1</b>    |        |        |       |        | 0,034  |
|                 | 0,235  |        |       |        |        |
| <b>FLCN</b>     |        |        |       |        | 0,032  |
|                 |        | 0,226  |       |        |        |
| <b>BRD2</b>     |        |        |       |        | 0,031  |
|                 |        |        |       | 0,22   |        |
| <b>JAK2</b>     |        |        |       |        | 0,030  |
|                 |        |        | 0,207 |        |        |
| <b>SMAD4</b>    |        |        | 0,206 |        | 0,029  |
| <b>BRD3</b>     |        |        |       |        | 0,025  |
|                 | 0,261  | 0,257  |       | -0,341 |        |
| <b>MAP2K1</b>   |        |        |       | 0,374  | 0,023  |
|                 |        | -0,216 |       |        |        |
| <b>MEN1</b>     |        |        |       | -0,236 | 0,016  |
|                 | 0,347  |        |       |        |        |
| <b>AKT2</b>     |        |        |       |        | 0,000  |
| <b>ARAF</b>     |        |        |       |        | 0,000  |
| <b>BAP1</b>     |        |        |       |        | 0,000  |
| <b>c15orf55</b> |        |        |       |        | 0,000  |
| <b>CCND2</b>    |        |        |       |        | 0,000  |
| <b>CCND3</b>    |        |        |       |        | 0,000  |
| <b>CDH1</b>     |        |        |       |        | 0,000  |
| <b>CEBPA</b>    |        |        |       |        | 0,000  |
| <b>CREBBP</b>   |        |        |       |        | 0,000  |
| <b>DNMT3A</b>   |        |        |       |        | 0,000  |
| <b>EGFR</b>     |        |        |       |        | 0,000  |
| <b>ERBB3</b>    |        |        |       |        | 0,000  |
| <b>ERRFI1</b>   |        |        |       |        | 0,000  |
| <b>ETV5</b>     |        |        |       |        | 0,000  |
| <b>FGFR3</b>    |        |        |       |        | 0,000  |
| <b>IGF1R</b>    |        |        |       |        | 0,000  |
| <b>PIK3R1</b>   |        |        |       |        | 0,000  |
| <b>SMO</b>      |        |        |       |        | 0,000  |
| <b>TMPRSS2</b>  |        |        |       |        | 0,000  |
| <b>TP53</b>     |        |        |       |        | 0,000  |
| <b>WT1</b>      |        |        |       |        | 0,000  |
| <b>ZNRF3</b>    |        |        |       |        | 0,000  |
| <b>ABL1</b>     |        |        |       |        | -0,012 |

|                |        |        |        |        |
|----------------|--------|--------|--------|--------|
|                | 0,248  | -0,329 |        |        |
| <b>MAPK1</b>   |        | -0,264 |        | -0,025 |
|                | 0,3    |        | -0,21  |        |
| <b>MDM2</b>    |        | -0,219 |        | -0,031 |
| <b>RET</b>     |        |        |        | -0,033 |
|                | -0,231 |        |        |        |
| <b>NKX2-1</b>  |        |        |        | -0,034 |
|                |        |        | -0,236 |        |
| <b>IDH2</b>    |        |        |        | -0,035 |
|                |        | -0,243 |        |        |
| <b>ROS1</b>    |        |        |        | -0,035 |
|                |        |        | -0,243 |        |
| <b>FLT3</b>    |        |        |        | -0,035 |
|                | -0,247 |        |        |        |
| <b>ERBB2</b>   | -0,249 |        |        | -0,036 |
| <b>ERCC2</b>   |        |        |        | -0,036 |
|                |        |        | -0,249 |        |
| <b>NOTCH2</b>  |        |        |        | -0,036 |
|                |        | -0,249 |        |        |
| <b>STK11</b>   |        |        |        | -0,036 |
|                |        |        | -0,249 |        |
| <b>CRKL</b>    |        |        |        | -0,036 |
|                |        | -0,252 |        |        |
| <b>NF2</b>     |        |        |        | -0,039 |
|                |        |        | -0,271 |        |
| <b>APC</b>     |        |        |        | -0,040 |
|                |        | -0,277 |        |        |
| <b>ERBB4</b>   |        |        |        | -0,042 |
|                |        |        | -0,292 |        |
| <b>MLL</b>     |        |        |        | -0,046 |
|                |        |        | -0,319 |        |
| <b>PDGFRB</b>  |        |        |        | -0,047 |
|                | -0,328 |        |        |        |
| <b>SMAD2</b>   |        |        |        | -0,047 |
|                | -0,334 | -0,236 | 0,241  |        |
| <b>AKT3</b>    |        |        |        | -0,048 |
|                | -0,336 |        |        |        |
| <b>KDR</b>     |        |        |        | -0,050 |
|                |        | -0,351 |        |        |
| <b>ERG</b>     |        |        |        | -0,056 |
|                | -0,395 |        |        |        |
| <b>SMARCB1</b> |        |        |        | -0,061 |
|                |        |        | -0,424 |        |
| <b>NFKBIA</b>  |        |        | -0,216 | -0,062 |
|                |        | -0,216 |        |        |
| <b>ETV6</b>    |        |        |        | -0,064 |
|                |        |        | -0,215 | -0,236 |
| <b>MAP3K1</b>  |        |        |        | -0,065 |
|                | -0,222 | -0,234 |        |        |
| <b>RUNX1</b>   | -0,222 |        |        | -0,068 |
|                |        |        | -0,252 |        |
| <b>TET2</b>    |        |        |        | -0,068 |

|               |        |        |        |        |        |        |
|---------------|--------|--------|--------|--------|--------|--------|
|               |        | -0,213 |        | -0,262 |        |        |
| <b>ALK</b>    |        | -0,294 |        |        |        | -0,072 |
|               | -0,212 |        |        |        |        |        |
| <b>MYD88</b>  |        |        |        | -0,248 |        | -0,073 |
|               |        |        |        | -0,261 | -0,263 |        |
| <b>PDGFRA</b> |        |        |        |        |        | -0,075 |
|               | -0,261 |        |        |        |        |        |
| <b>KIT</b>    |        |        |        | -0,266 |        | -0,076 |
|               |        | -0,263 |        |        |        |        |
| <b>MAP2K4</b> |        | -0,243 |        | -0,292 |        | -0,076 |
| <b>RAB35</b>  |        |        |        |        |        | -0,077 |
|               |        | -0,245 |        |        | -0,296 |        |
| <b>MCL1</b>   |        |        |        | -0,345 |        | -0,080 |
|               |        | -0,217 |        | -0,251 |        |        |
| <b>EPHA3</b>  |        |        |        |        |        | -0,081 |
|               | -0,314 |        |        |        |        |        |
| <b>FGFR1</b>  | -0,37  |        |        |        |        | -0,087 |
|               |        |        |        |        | -0,238 |        |
| <b>MITF</b>   | -0,357 |        |        | -0,251 |        | -0,087 |
| <b>RSPO2</b>  | -0,212 |        |        | -0,2   |        | -0,089 |
|               |        |        |        |        | -0,208 |        |
| <b>MPL</b>    |        |        |        |        | -0,403 | -0,092 |
|               |        | -0,243 |        |        |        |        |
| <b>ESR1</b>   |        |        |        |        | -0,41  | -0,098 |
|               |        |        |        |        | -0,279 |        |
| <b>AR</b>     |        |        |        |        | -0,232 | -0,101 |
|               |        | -0,215 |        | -0,263 |        |        |
| <b>GNA11</b>  |        | -0,219 |        | -0,206 | -0,291 | -0,102 |
| <b>GNAQ</b>   |        | -0,424 |        | -0,296 |        | -0,103 |
| <b>JAK3</b>   |        |        |        |        |        | -0,117 |
|               | -0,221 |        |        |        | -0,287 | -0,308 |
| <b>DDR2</b>   | -0,362 |        |        |        |        | -0,25  |
|               |        |        |        | -0,212 |        |        |
| <b>TSC2</b>   | -0,234 |        |        |        | -0,378 | -0,126 |
|               |        |        |        |        |        | -0,272 |
| <b>NTRK3</b>  | -0,2   |        |        |        | -0,208 | -0,143 |
|               |        | -0,206 |        |        | -0,389 |        |
|               |        |        |        |        |        |        |
| <b>MAP2K2</b> |        |        | -0,223 |        | -0,351 | -0,162 |
| <b>RARA</b>   |        |        | -0,221 |        | -0,359 | -0,171 |
|               | -0,242 |        |        |        |        | -0,374 |
| <b>CDKN1A</b> |        |        | -0,384 | -0,32  | -0,273 | -0,175 |
|               |        |        |        | -0,382 |        | -0,251 |
| <b>BCL2</b>   |        |        | -0,297 |        | -0,209 | -0,188 |
|               | -0,221 | -0,207 |        |        |        |        |
| <b>FGFR2</b>  | -0,466 |        | -0,253 | -0,31  | -0,332 | -0,236 |
|               |        |        |        | -0,252 |        |        |
| <b>MAPK3</b>  | -0,413 |        |        |        | -0,385 | -0,246 |
|               |        | -0,253 |        |        |        | -0,421 |
|               |        |        |        | -0,421 |        | -0,222 |
| <b>CDKN2B</b> | -0,436 |        |        | -0,269 |        | -0,29  |
|               |        |        |        |        |        | -0,154 |
