# Supplementary material for: High Throughput Fluorescence-Based In Vitro Experimental Platform for the Identification of Effective Therapies to Overcome Tumour Microenvironment-Mediated Drug Resistance in AML
Source: MDPI journal article supplement (doi:10.3390/cancers15071988), 2023-03-27
Supplement: s1 [file s1]

**Supplementary Table S3: Correlation indexes of the co-expression of CRM1 and TARGET genes ( $R > 0.2$ ;  $R < -0.2$ ) with a significant statistically significant value ( $p \leq 0.05$ ) in analysed prostate cancer databases.** The column on the right shows the average correlation value of the databases studied.

|               | Prostate cancer |        |          |        |       |            |         |
|---------------|-----------------|--------|----------|--------|-------|------------|---------|
|               | Glinsky         | Grasso | Lapointe | Taylor | TCGA  | Varambally | Average |
| <i>MSH2</i>   | 0,284           | 0,414  | 0,679    | 0,758  | 0,623 |            | 0,460   |
| <i>RB1</i>    |                 | 0,474  |          | 0,747  | 0,495 | 0,824      | 0,423   |
| <i>FBXW7</i>  | 0,229           |        |          | 0,635  | 0,426 | 0,922      | 0,369   |
| <i>ATM</i>    |                 |        |          | 0,796  | 0,571 | 0,795      | 0,360   |
| <i>CTNNB1</i> |                 |        | 0,834    | 0,858  | 0,314 |            | 0,334   |
| <i>ATR</i>    |                 | 0,366  |          | 0,825  | 0,592 |            | 0,297   |
| <i>NOTCH2</i> |                 |        | 0,573    | 0,572  | 0,49  |            | 0,273   |
| <i>DDR2</i>   |                 |        |          | 0,373  | 0,338 | 0,805      | 0,253   |
| <i>MDM4</i>   |                 | -0,312 | 0,659    | 0,717  | 0,44  |            | 0,251   |
| <i>PIK3CA</i> |                 |        |          | 0,837  | 0,569 |            | 0,234   |
| <i>NF1</i>    |                 |        |          | 0,782  | 0,546 |            | 0,221   |
| <i>BRAF</i>   |                 |        |          | 0,759  | 0,553 |            | 0,219   |
| <i>TET2</i>   |                 |        |          | 0,622  | 0,656 |            | 0,213   |
| <i>MLH1</i>   |                 | 0,499  |          | 0,766  |       |            | 0,211   |
| <i>MSH6</i>   |                 |        |          | 0,725  | 0,533 |            | 0,210   |
| <i>PDGFRA</i> |                 |        |          | 0,279  |       | 0,973      | 0,209   |
| <i>KRAS</i>   |                 |        |          | 0,706  | 0,534 |            | 0,207   |
| <i>GNAQ</i>   |                 |        |          | 0,827  | 0,371 |            | 0,200   |
| <i>APC</i>    |                 |        |          | 0,779  | 0,403 |            | 0,197   |
| <i>CCND2</i>  |                 |        |          | 0,252  | 0,926 |            | 0,196   |
| <i>SMAD2</i>  |                 |        |          | 0,77   | 0,369 |            | 0,190   |
| <i>MAP3K1</i> |                 |        |          | 0,604  | 0,527 |            | 0,189   |
| <i>NRAS</i>   |                 |        |          | 0,724  | 0,347 |            | 0,179   |
| <i>MAPK1</i>  |                 |        |          | 0,69   | 0,374 |            | 0,177   |
| <i>VHL</i>    |                 |        |          | 0,518  | 0,533 |            | 0,175   |
| <i>PIK3CB</i> |                 |        |          | 0,742  | 0,287 |            | 0,172   |
| <i>CDKN1B</i> | 0,355           |        |          | 0,411  | 0,262 |            | 0,171   |
| <i>JAK2</i>   |                 |        |          | 0,62   | 0,374 |            | 0,166   |
| <i>RAF1</i>   |                 |        |          | 0,719  | 0,247 |            | 0,161   |
| <i>CDK12</i>  |                 |        |          | 0,47   | 0,487 |            | 0,160   |
| <i>PIK3R1</i> |                 |        |          | 0,661  | 0,262 |            | 0,154   |
| <i>MDM2</i>   |                 |        |          | 0,562  | 0,335 |            | 0,150   |
| <i>MYC</i>    |                 |        | 0,66     | 0,225  |       |            | 0,148   |
| <i>BRD2</i>   |                 |        |          | 0,423  | 0,435 |            | 0,143   |
| <i>CREBBP</i> |                 |        |          | 0,365  | 0,493 |            | 0,143   |
| <i>MCL1</i>   |                 |        |          | 0,598  | 0,216 |            | 0,136   |
| <i>PDGFRB</i> |                 |        |          |        |       | 0,797      | 0,133   |
| <i>NPM1</i>   |                 |        |          | 0,735  |       |            | 0,123   |
| <i>RHEB</i>   |                 |        |          | 0,707  |       |            | 0,118   |
| <i>MAP2K4</i> | -0,239          | 0,284  |          | 0,648  |       |            | 0,116   |
| <i>AKT3</i>   |                 |        |          | 0,682  |       |            | 0,114   |

|               |        |        |        |        |
|---------------|--------|--------|--------|--------|
| <b>SMAD4</b>  |        | 0,682  |        | 0,114  |
| <b>CRKL</b>   |        | 0,204  |        | 0,109  |
|               |        |        | 0,448  |        |
| <b>PTEN</b>   |        | 0,62   |        | 0,103  |
| <b>IDH1</b>   |        | 0,578  |        | 0,096  |
| <b>PTCH1</b>  |        |        |        | 0,089  |
|               |        |        | 0,533  |        |
| <b>BRCA1</b>  |        |        | 0,527  | 0,088  |
| <b>EZH2</b>   |        |        | 0,288  | 0,084  |
|               | 0,243  | 0,658  |        | -0,684 |
| <b>CDH1</b>   |        |        |        | 0,083  |
|               |        | 0,497  |        |        |
| <b>MED12</b>  |        |        |        | 0,069  |
|               |        |        | 0,415  |        |
| <b>IDH2</b>   |        |        | -0,397 | 0,068  |
|               |        |        |        | 0,806  |
| <b>ESR1</b>   |        |        | 0,809  | 0,066  |
|               |        | -0,411 |        |        |
| <b>EPHA3</b>  |        | 0,394  |        | 0,066  |
| <b>EWSR1</b>  |        | 0,394  |        | 0,066  |
| <b>MAP2K1</b> |        | 0,389  |        | 0,065  |
| <b>GNAS</b>   |        | 0,378  |        | 0,063  |
| <b>ASXL1</b>  |        |        |        | 0,061  |
|               |        |        | 0,365  |        |
| <b>KDR</b>    |        |        |        | 0,054  |
|               |        | 0,323  |        |        |
| <b>BRCA2</b>  |        | -0,294 |        | 0,053  |
|               |        |        | 0,612  |        |
| <b>KIT</b>    |        | 0,31   |        | 0,052  |
| <b>MET</b>    |        | 0,31   |        | 0,052  |
| <b>GNA11</b>  |        |        |        | 0,049  |
|               |        |        | 0,292  |        |
| <b>ERRFI1</b> |        |        |        | 0,049  |
|               |        | 0,291  |        |        |
| <b>ETV6</b>   |        | 0,274  |        | 0,046  |
| <b>CDK4</b>   |        | 0,267  |        | 0,045  |
| <b>TSC2</b>   |        |        |        | 0,045  |
|               | 0,267  |        |        |        |
| <b>MYD88</b>  |        |        |        | 0,042  |
|               |        |        | 0,249  |        |
| <b>SYK</b>    |        |        | 0,237  | 0,040  |
| <b>DNMT3A</b> |        |        | 0,418  | 0,039  |
|               | 0,243  | -0,426 |        |        |
| <b>MITF</b>   |        | 0,211  |        | 0,035  |
| <b>NOTCH1</b> |        |        |        | 0,035  |
|               |        |        | 0,209  |        |
| <b>ABL1</b>   |        |        | 0,282  | 0,033  |
|               | -0,308 | 0,221  |        |        |
| <b>TSC1</b>   |        | 0,358  | 0,345  | 0,018  |
|               |        | -0,596 |        |        |
| <b>AR</b>     |        | 0,309  | 0,521  | 0,007  |
|               |        |        | -0,791 |        |

|                 |        |        |        |        |
|-----------------|--------|--------|--------|--------|
| <b>NF2</b>      |        | 0,306  |        | 0,001  |
|                 | -0,301 |        |        |        |
| <b>BCL2</b>     |        |        |        | 0,000  |
| <b>c15orf55</b> |        |        |        | 0,000  |
| <b>ETV1</b>     |        |        |        | 0,000  |
| <b>ETV5</b>     |        |        |        | 0,000  |
| <b>FGFR2</b>    |        |        |        | 0,000  |
| <b>FLCN</b>     |        |        |        | 0,000  |
|                 | 0,273  | -0,645 | 0,372  |        |
| <b>MLL</b>      |        |        |        | 0,000  |
| <b>MPL</b>      |        |        |        | 0,000  |
| <b>RAB35</b>    |        |        |        | 0,000  |
| <b>SMARCA4</b>  |        |        |        | 0,000  |
| <b>TP53</b>     |        |        |        | 0,000  |
| <b>BRD4</b>     |        |        |        | -0,001 |
|                 |        | -0,311 | 0,303  |        |
| <b>AURKA</b>    |        | 0,221  | 0,299  | -0,016 |
|                 | 0,257  |        | -0,872 |        |
| <b>BRD3</b>     | -0,301 | -0,335 | 0,505  | -0,022 |
| <b>FLT3</b>     | 0,299  | -0,455 |        | -0,026 |
| <b>NTRK3</b>    |        | -0,22  |        | -0,037 |
| <b>NFKBIA</b>   |        |        |        | -0,039 |
|                 | -0,231 |        |        |        |
| <b>RSPO2</b>    |        |        |        | -0,040 |
|                 |        |        | -0,239 |        |
| <b>ERG</b>      |        |        | 0,205  | -0,042 |
|                 |        | 0,232  | -0,689 |        |
| <b>RET</b>      |        | -0,274 |        | -0,046 |
| <b>MAPK3</b>    |        |        |        | -0,048 |
|                 |        |        | -0,29  |        |
| <b>RUNX1</b>    |        |        |        | -0,048 |
|                 |        | -0,29  |        |        |
| <b>EGFR</b>     |        | 0,232  |        | -0,050 |
|                 |        |        | 0,396  | -0,925 |
| <b>MTOR</b>     |        |        |        | -0,050 |
|                 | -0,298 |        |        |        |
| <b>AKT1</b>     |        |        |        | -0,050 |
|                 | -0,301 |        |        |        |
| <b>ROS1</b>     |        |        |        | -0,051 |
|                 |        | -0,622 | 0,316  |        |
| <b>ERBB4</b>    |        | -0,322 |        | -0,054 |
| <b>CCND1</b>    |        |        |        | -0,056 |
|                 | -0,335 |        |        |        |
| <b>ZNRF3</b>    | -0,384 |        |        | -0,064 |
| <b>RNF43</b>    | -0,405 |        |        | -0,068 |
| <b>ARAF</b>     |        |        |        | -0,085 |
|                 |        |        | -0,507 |        |
| <b>IGF1R</b>    |        |        |        | -0,085 |
|                 |        | 0,282  | -0,792 |        |
| <b>NKX2-1</b>   |        | -0,759 |        | -0,091 |

|                |        |        |        |        |        |        |
|----------------|--------|--------|--------|--------|--------|--------|
|                |        |        |        |        | 0,214  |        |
| <b>MEN1</b>    |        |        |        | -0,55  |        | -0,092 |
| <b>ETV4</b>    |        |        |        | -0,332 |        | -0,095 |
|                |        |        |        |        | -0,236 |        |
| <b>WT1</b>     |        |        |        | -0,593 |        | -0,099 |
| <b>CDKN2A</b>  |        |        |        | -0,599 |        | -0,100 |
| <b>FGFR3</b>   |        |        |        | -0,626 |        | -0,104 |
| <b>CCNE1</b>   |        |        |        | -0,631 |        | -0,105 |
| <b>BAP1</b>    |        |        |        | -0,428 |        | -0,107 |
|                |        |        |        |        | -0,211 |        |
| <b>ALK</b>     |        |        |        | -0,667 |        | -0,111 |
| <b>AKT2</b>    |        |        |        | -0,369 |        | -0,119 |
|                | -0,346 |        |        |        |        |        |
| <b>CDKN2B</b>  |        |        |        | -0,735 |        | -0,123 |
| <b>TMPRSS2</b> |        |        |        |        |        | -0,125 |
|                |        |        | -0,751 |        |        |        |
| <b>STK11</b>   |        |        |        |        |        | -0,127 |
|                |        |        |        | -0,414 | -0,349 |        |
| <b>ERCC2</b>   |        |        |        | -0,563 | -0,242 | -0,134 |
| <b>CDK6</b>    |        |        |        | 0,283  |        | -0,135 |
|                |        | -0,474 | -0,62  |        |        |        |
| <b>ERBB2</b>   |        |        | -0,601 |        |        | -0,139 |
|                | -0,233 |        |        |        |        |        |
| <b>FGFR1</b>   | -0,244 |        | -0,605 |        |        | -0,142 |
| <b>RARA</b>    | -0,269 |        |        |        |        | -0,152 |
|                |        |        |        | -0,641 |        |        |
| <b>JAK3</b>    |        |        |        | -0,418 |        | -0,179 |
|                |        |        | -0,656 |        |        |        |
| <b>CEBPA</b>   |        |        |        | -0,617 |        | -0,195 |
|                | 0,227  | -0,373 |        |        | -0,408 |        |
| <b>ERBB3</b>   |        | -0,325 |        |        |        | -0,198 |
|                |        |        |        |        | -0,865 |        |
| <b>CDKN1A</b>  |        |        |        |        |        | -0,207 |
|                | -0,373 |        | -0,604 |        | -0,264 |        |
| <b>SMO</b>     | -0,278 |        |        |        |        | -0,230 |
|                |        | -0,477 |        | -0,622 |        |        |
| <b>SMARCB1</b> |        |        |        | -0,256 |        | -0,260 |
|                |        |        |        |        | -0,378 | -0,928 |
| <b>HRAS</b>    |        |        |        | -0,717 | -0,497 | -0,270 |
|                |        | -0,406 |        |        |        |        |
| <b>MAP2K2</b>  |        |        |        | -0,328 | -0,627 | -0,288 |
|                |        |        |        |        |        | -0,771 |
| <b>CCND3</b>   |        |        |        | -0,603 | -0,303 | -0,843 |
|                |        |        |        |        |        | -0,292 |
|                |        |        |        |        |        |        |
|                |        |        |        |        |        |        |
