# Supplementary material for: High Throughput Fluorescence-Based In Vitro Experimental Platform for the Identification of Effective Therapies to Overcome Tumour Microenvironment-Mediated Drug Resistance in AML
Source: MDPI journal article supplement (doi:10.3390/cancers15071988), 2023-03-27
Supplement: s1 [file s1]

**Supplementary Table S2: Correlation indexes of the co-expression of CRM1 and TARGET genes ( $R > 0.2$ ;  $R < -0.2$ ) with a significant statistically significant value ( $p \leq 0.05$ ) in analysed lung adenocarcinoma cancer databases.** The column on the right shows the average correlation value of the databases studied.

| <b>Lung adenocarcinoma</b> |                |                |             |                  |                |
|----------------------------|----------------|----------------|-------------|------------------|----------------|
|                            | <b>Chitale</b> | <b>Shedden</b> | <b>TCGA</b> | <b>Wilkerson</b> | <b>Average</b> |
| <i>MSH2</i>                | 0,559          | 0,715          | 0,648       | 0,565            | 0,622          |
| <i>MSH6</i>                | 0,564          | 0,662          | 0,592       | 0,58             | 0,600          |
| <i>ATR</i>                 | 0,508          | 0,738          | 0,404       | 0,476            | 0,532          |
| <i>EZH2</i>                | 0,488          | 0,509          | 0,516       | 0,577            | 0,523          |
| <i>BRCA2</i>               | 0,484          | 0,358          | 0,553       | 0,555            | 0,488          |
| <i>AURKA</i>               | 0,458          | 0,321          | 0,482       | 0,647            | 0,477          |
| <i>PIK3CA</i>              | 0,284          | 0,696          | 0,33        | 0,527            | 0,459          |
| <i>NRAS</i>                | 0,35           | 0,491          | 0,384       | 0,467            | 0,423          |
| <i>BRCA1</i>               | 0,427          |                | 0,535       | 0,651            | 0,403          |
| <i>CCNE1</i>               | 0,365          |                | 0,427       | 0,624            | 0,354          |
| <i>PIK3CB</i>              | 0,294          | 0,456          |             | 0,384            | 0,284          |
| <i>BRAF</i>                | 0,402          |                | 0,312       | 0,413            | 0,282          |
| <i>CDK12</i>               | 0,37           | 0,363          | 0,361       |                  | 0,274          |
| <i>IDH1</i>                | 0,339          | 0,438          |             | 0,247            | 0,256          |
| <i>DNMT3A</i>              | 0,328          | -0,264         | 0,392       | 0,505            | 0,240          |
| <i>NPM1</i>                |                | 0,586          |             | 0,215            | 0,200          |
|                            |                |                |             |                  | 0,198          |
| <i>MAP2K4</i>              | 0,222          | 0,514          |             |                  | 0,184          |
| <i>ASXL1</i>               | 0,265          | 0,202          | 0,23        |                  | 0,174          |
| <i>KRAS</i>                |                | 0,421          | 0,264       |                  | 0,171          |
| <i>CDKN2A</i>              | 0,415          |                |             | 0,238            | 0,163          |
| <i>NF1</i>                 | 0,356          | 0,253          |             |                  | 0,152          |
| <i>SMAD4</i>               |                | 0,608          |             |                  | 0,152          |
| <i>MED12</i>               | 0,218          |                |             | 0,329            | 0,137          |
| <i>MAPK1</i>               | 0,237          | 0,301          |             |                  | 0,135          |
| <i>CRKL</i>                |                |                |             | 0,528            | 0,132          |
| <i>MLH1</i>                |                | 0,504          |             |                  | 0,126          |
| <i>RB1</i>                 |                | 0,494          |             |                  | 0,124          |
| <i>PTEN</i>                |                | 0,482          |             |                  | 0,121          |
| <i>HRAS</i>                | 0,225          |                |             | 0,253            | 0,120          |
| <i>ATM</i>                 |                | 0,467          |             |                  | 0,117          |

|                |       |       |       |       |
|----------------|-------|-------|-------|-------|
| <b>MAP2K2</b>  |       | 0,448 |       | 0,112 |
| <b>SMAD2</b>   |       | 0,432 |       | 0,108 |
| <b>SMARCB1</b> |       |       | 0,398 | 0,100 |
| <b>CDKN1B</b>  |       | 0,388 |       | 0,097 |
| <b>FLCN</b>    |       |       | 0,383 | 0,096 |
|                |       |       |       | 0,094 |
| <b>ERBB2</b>   | 0,358 |       |       | 0,090 |
| <b>MEN1</b>    | 0,349 |       |       | 0,087 |
| <b>AKT1</b>    | 0,339 |       |       | 0,085 |

|                 |        |        |        |        |        |
|-----------------|--------|--------|--------|--------|--------|
| <b>RHEB</b>     | 0,333  |        |        |        | 0,083  |
| <b>BRD3</b>     | 0,298  |        |        |        | 0,075  |
| <b>CDK4</b>     |        |        |        | 0,297  | 0,074  |
| <b>VHL</b>      |        |        | 0,294  |        | 0,074  |
| <b>EWSR1</b>    | 0,29   |        |        |        | 0,073  |
| <b>IDH2</b>     |        |        |        | 0,272  | 0,068  |
| <b>GNAS</b>     |        |        |        | 0,271  | 0,068  |
| <b>MAP2K1</b>   |        | 0,262  |        |        | 0,066  |
| <b>NOTCH2</b>   |        | 0,245  |        |        | 0,061  |
| <b>BRD2</b>     | 0,241  |        |        |        | 0,060  |
| <b>RNF43</b>    |        |        |        | 0,239  | 0,060  |
| <b>CREBBP</b>   | 0,234  |        |        |        | 0,059  |
| <b>CDK6</b>     | 0,215  | -0,516 | 0,209  | 0,322  | 0,058  |
| <b>APC</b>      |        | 0,227  |        |        | 0,057  |
| <b>ETV6</b>     | 0,218  |        |        |        | 0,055  |
| <b>NF2</b>      |        | -0,272 |        | 0,46   | 0,047  |
| <b>JAK2</b>     |        | 0,325  |        | -0,301 | 0,006  |
| <b>c15orf55</b> |        |        |        |        | 0,000  |
| <b>CDH1</b>     |        |        |        |        | 0,000  |
| <b>ERBB3</b>    |        |        |        |        | 0,000  |
| <b>ERRFI1</b>   |        |        |        |        | 0,000  |
| <b>FGFR3</b>    |        |        |        |        | 0,000  |
| <b>GNAQ</b>     |        |        |        |        | 0,000  |
| <b>IGF1R</b>    |        |        |        |        | 0,000  |
| <b>MAP3K1</b>   |        |        |        |        | 0,000  |
| <b>MDM4</b>     |        |        |        |        | 0,000  |
| <b>MET</b>      |        |        |        |        | 0,000  |
| <b>MLL</b>      |        |        |        |        | 0,000  |
| <b>MYC</b>      |        |        |        |        | 0,000  |
| <b>NFKBIA</b>   |        |        |        |        | 0,000  |
| <b>PTCH1</b>    |        |        |        |        | 0,000  |
| <b>RET</b>      |        |        |        |        | 0,000  |
| <b>SMARCA4</b>  |        |        |        |        | 0,000  |
| <b>TET2</b>     |        |        |        |        | 0,000  |
| <b>ZNRF3</b>    |        |        |        |        | 0,000  |
| <b>TSC1</b>     |        | 0,39   |        | -0,403 | -0,003 |
| <b>SMO</b>      |        | -0,396 |        | 0,318  | -0,020 |
| <b>MTOR</b>     | 0,212  | -0,34  |        |        | -0,032 |
| <b>CCND1</b>    | -0,203 |        |        |        | -0,051 |
| <b>TP53</b>     |        |        |        | -0,218 | -0,055 |
| <b>ETV5</b>     |        |        | -0,221 |        | -0,055 |
| <b>AKT3</b>     | -0,222 |        |        |        | -0,056 |
| <b>EPHA3</b>    |        |        | -0,222 |        | -0,056 |
| <b>TSC2</b>     |        |        |        | -0,232 | -0,058 |

|                 |        |        |       |        |        |
|-----------------|--------|--------|-------|--------|--------|
| <b>NOTCH1</b>   |        | -0,235 |       |        | -0,059 |
| <b>ETV4</b>     |        | -0,239 |       |        | -0,060 |
| <b>MDM2</b>     |        | -0,249 |       |        | -0,062 |
| <b>RAF1</b>     | 0,388  | 0,405  |       |        |        |
| <b>CTNNB1</b>   |        | 0,377  |       |        |        |
| <b>RHEB</b>     | 0,333  |        |       |        | 0,083  |
| <b>BRD3</b>     | 0,298  |        |       |        | 0,075  |
| <b>CDK4</b>     |        |        |       | 0,297  | 0,074  |
| <b>VHL</b>      |        |        | 0,294 |        | 0,074  |
| <b>EWSR1</b>    | 0,29   |        |       |        | 0,073  |
| <b>IDH2</b>     |        |        |       | 0,272  | 0,068  |
| <b>GNAS</b>     |        |        |       | 0,271  | 0,068  |
| <b>MAP2K1</b>   |        | 0,262  |       |        | 0,066  |
| <b>NOTCH2</b>   |        | 0,245  |       |        | 0,061  |
| <b>BRD2</b>     | 0,241  |        |       |        | 0,060  |
| <b>RNF43</b>    |        |        |       | 0,239  | 0,060  |
| <b>CREBBP</b>   | 0,234  |        |       |        | 0,059  |
| <b>CDK6</b>     | 0,215  | -0,516 | 0,209 | 0,322  | 0,058  |
| <b>APC</b>      |        | 0,227  |       |        | 0,057  |
| <b>ETV6</b>     | 0,218  |        |       |        | 0,055  |
| <b>NF2</b>      |        | -0,272 |       | 0,46   | 0,047  |
| <b>JAK2</b>     |        | 0,325  |       | -0,301 | 0,006  |
| <b>c15orf55</b> |        |        |       |        | 0,000  |
| <b>CDH1</b>     |        |        |       |        | 0,000  |
| <b>ERBB3</b>    |        |        |       |        | 0,000  |
| <b>ERRFI1</b>   |        |        |       |        | 0,000  |
| <b>FGFR3</b>    |        |        |       |        | 0,000  |
| <b>GNAQ</b>     |        |        |       |        | 0,000  |
| <b>IGF1R</b>    |        |        |       |        | 0,000  |
| <b>MAP3K1</b>   |        |        |       |        | 0,000  |
| <b>MDM4</b>     |        |        |       |        | 0,000  |
| <b>MET</b>      |        |        |       |        | 0,000  |
| <b>MLL</b>      |        |        |       |        | 0,000  |
| <b>MYC</b>      |        |        |       |        | 0,000  |
| <b>NFKBIA</b>   |        |        |       |        | 0,000  |
| <b>PTCH1</b>    |        |        |       |        | 0,000  |
| <b>RET</b>      |        |        |       |        | 0,000  |
| <b>SMARCA4</b>  |        |        |       |        | 0,000  |
| <b>TET2</b>     |        |        |       |        | 0,000  |
| <b>ZNRF3</b>    |        |        |       |        | 0,000  |
| <b>TSC1</b>     |        | 0,39   |       | -0,403 | -0,003 |
| <b>SMO</b>      |        | -0,396 |       | 0,318  | -0,020 |
| <b>MTOR</b>     | 0,212  | -0,34  |       |        | -0,032 |
| <b>CCND1</b>    | -0,203 |        |       |        | -0,051 |

|                |        |        |        |        |
|----------------|--------|--------|--------|--------|
| <b>TP53</b>    |        |        | -0,218 | -0,055 |
| <b>ETV5</b>    |        | -0,221 |        | -0,055 |
| <b>AKT3</b>    | -0,222 |        |        | -0,056 |
| <b>EPHA3</b>   |        | -0,222 |        | -0,056 |
| <b>TSC2</b>    |        |        | -0,232 | -0,058 |
| <b>NOTCH1</b>  | -0,235 |        |        | -0,059 |
| <b>ETV4</b>    | -0,239 |        |        | -0,060 |
| <b>MDM2</b>    | -0,249 |        |        | -0,062 |
|                |        |        |        |        |
| <b>AKT2</b>    | -0,572 |        | 0,32   | -0,063 |
| <b>BAP1</b>    | -0,257 |        |        | -0,064 |
| <b>ROS1</b>    |        | -0,257 |        | -0,064 |
| <b>FBXW7</b>   | -0,264 |        |        | -0,066 |
| <b>MITF</b>    | -0,264 |        |        | -0,066 |
| <b>EGFR</b>    | -0,265 |        |        | -0,066 |
| <b>PIK3R1</b>  | -0,28  |        |        | -0,070 |
| <b>SYK</b>     |        |        | -0,284 | -0,071 |
| <b>KIT</b>     |        |        | -0,286 | -0,072 |
| <b>FGFR1</b>   | -0,299 |        |        | -0,075 |
| <b>ABL1</b>    |        |        | -0,322 | -0,081 |
| <b>MYD88</b>   |        |        | -0,34  | -0,085 |
| <b>ALK</b>     | -0,344 |        |        | -0,086 |
| <b>MCL1</b>    |        |        | -0,353 | -0,088 |
| <b>BRD4</b>    | -0,355 |        |        | -0,089 |
| <b>WT1</b>     | -0,38  |        |        | -0,095 |
| <b>AR</b>      | -0,263 |        | -0,202 | -0,116 |
| <b>NKX2-1</b>  |        |        | -0,473 | -0,118 |
| <b>KDR</b>     |        |        | -0,481 | -0,120 |
| <b>ERCC2</b>   | -0,489 |        |        | -0,122 |
| <b>RAB35</b>   | -0,492 |        |        | -0,123 |
| <b>ETV1</b>    | -0,28  | -0,231 |        | -0,128 |
| <b>ARAF</b>    | -0,235 | -0,311 |        | -0,137 |
| <b>FGFR2</b>   | -0,32  | -0,24  |        | -0,140 |
| <b>CDKN2B</b>  | -0,363 |        | -0,211 | -0,144 |
| <b>PDGFRA</b>  | -0,281 |        | -0,301 | -0,146 |
| <b>CCND3</b>   |        | -0,268 | -0,315 | -0,146 |
| <b>TMPRSS2</b> |        |        | -0,653 | -0,163 |
| <b>RSPO2</b>   |        | -0,279 | -0,38  | -0,165 |
| <b>DDR2</b>    | -0,401 | -0,278 |        | -0,170 |

|               |        |        |        |        |        |
|---------------|--------|--------|--------|--------|--------|
| <b>MPL</b>    |        | -0,681 |        |        | -0,170 |
| <b>CDKN1A</b> |        |        | -0,261 | -0,453 | -0,179 |
| <b>BCL2</b>   | -0,322 | -0,403 |        |        | -0,181 |
| <b>STK11</b>  |        | -0,497 | -0,233 |        | -0,183 |
| <b>MAPK3</b>  |        | -0,533 | -0,203 |        | -0,184 |
| <b>CEBPA</b>  | -0,315 |        | -0,206 | -0,253 | -0,194 |
| <b>ERBB4</b>  | -0,218 | -0,3   | -0,304 |        | -0,206 |
| <b>ESR1</b>   | -0,313 | -0,539 |        |        | -0,213 |
| <b>RUNX1</b>  |        | -0,51  |        | -0,36  | -0,218 |
| <b>JAK3</b>   | -0,216 | -0,672 |        |        | -0,222 |
| <b>CCND2</b>  | -0,276 | -0,286 | -0,224 | -0,211 | -0,249 |
| <b>GNA11</b>  | -0,312 | -0,429 |        | -0,423 | -0,291 |
| <b>FLT3</b>   | -0,325 | -0,632 |        | -0,248 | -0,301 |
| <b>PDGFRB</b> | -0,361 | -0,319 | -0,254 | -0,424 | -0,340 |
| <b>ERG</b>    | -0,398 | -0,215 | -0,324 | -0,496 | -0,358 |
| <b>RARA</b>   |        | -0,547 | -0,397 | -0,5   | -0,361 |
