# Supplementary material for: High Throughput Fluorescence-Based In Vitro Experimental Platform for the Identification of Effective Therapies to Overcome Tumour Microenvironment-Mediated Drug Resistance in AML
Source: MDPI journal article supplement (doi:10.3390/cancers15071988), 2023-03-27
Supplement: s1 [file s1]

**Supplementary Table S5: Correlation indexes of the co-expression of CRM1 and TARGET genes ( $R > 0.2$ ;  $R < -0.2$ ) with a significant statistically significant value ( $p \leq 0.05$ ) in analysed AML databases.** The column on the right shows the average correlation value of the databases studied.

|                | AML   |        |         |
|----------------|-------|--------|---------|
|                | Liu   | Tyner  | Average |
| <i>MSH2</i>    | 0,624 | 0,661  | 0,642   |
| <i>ATR</i>     | 0,557 | 0,552  | 0,554   |
| <i>BRCA1</i>   | 0,583 | 0,489  | 0,536   |
| <i>CDK6</i>    | 0,505 | 0,531  | 0,518   |
| <i>MSH6</i>    | 0,581 | 0,429  | 0,505   |
| <i>MLH1</i>    | 0,393 | 0,484  | 0,439   |
| <i>NF1</i>     | 0,509 | 0,209  | 0,359   |
| <i>NPM1</i>    | 0,403 | 0,304  | 0,354   |
| <i>TP53</i>    |       | 0,693  | 0,347   |
| <i>RUNX1</i>   | 0,286 | 0,387  | 0,337   |
| <i>MEN1</i>    |       | 0,658  | 0,329   |
| <i>FLT3</i>    | 0,226 | 0,431  | 0,328   |
| <i>BCL2</i>    | 0,291 | 0,351  | 0,321   |
| <i>RB1</i>     | 0,380 | 0,246  | 0,313   |
| <i>SMARCA4</i> |       | 0,595  | 0,297   |
| <i>IDH1</i>    |       | 0,580  | 0,290   |
| <i>CDK4</i>    |       | 0,572  | 0,286   |
| <i>SMAD4</i>   | 0,570 |        | 0,285   |
| <i>ERCC2</i>   |       | 0,566  | 0,283   |
| <i>MTOR</i>    |       | 0,559  | 0,280   |
| <i>PTEN</i>    | 0,350 | 0,206  | 0,278   |
| <i>BRD3</i>    |       | 0,533  | 0,266   |
| <i>AURKA</i>   | 0,221 | 0,298  | 0,259   |
| <i>GNAQ</i>    | 0,509 |        | 0,255   |
| <i>KIT</i>     | 0,279 | 0,230  | 0,254   |
| <i>BRCA2</i>   | 0,484 |        | 0,242   |
| <i>MED12</i>   |       | 0,451  | 0,226   |
| <i>MYC</i>     |       | 0,439  | 0,219   |
| <i>SMAD2</i>   | 0,416 |        | 0,208   |
| <i>IDH2</i>    |       | 0,380  | 0,190   |
| <i>ERBB2</i>   |       | 0,375  | 0,188   |
| <i>MAP2K4</i>  | 0,339 |        | 0,170   |
| <i>ZNRF3</i>   |       | 0,332  | 0,166   |
| <i>DNMT3A</i>  |       | 0,311  | 0,155   |
| <i>EZH2</i>    | 0,303 |        | 0,151   |
| <i>SMARCB1</i> |       | 0,297  | 0,148   |
| <i>PIK3CB</i>  | 0,271 |        | 0,136   |
| <i>CRKL</i>    | 0,271 |        | 0,135   |
| <i>PIK3R1</i>  | 0,510 | -0,271 | 0,119   |
| <i>FGFR3</i>   |       | 0,234  | 0,117   |

|                 |        |        |       |
|-----------------|--------|--------|-------|
| <b>MDM4</b>     | 0,221  |        | 0,111 |
| <b>CEBPA</b>    |        | 0,221  | 0,110 |
| <b>ETV6</b>     |        | 0,209  | 0,104 |
| <b>ATM</b>      |        | 0,202  | 0,101 |
| <b>EWSR1</b>    |        | 0,201  | 0,100 |
| <b>NRAS</b>     | 0,47 8 | -0,339 | 0,070 |
| <b>CDK12</b>    | 0,371  | -0,286 | 0,043 |
| <b>GNAS</b>     | -0,240 | 0,250  | 0,005 |
| <b>APC</b>      | 0,331  | -0,328 | 0,001 |
| <b>ALK</b>      |        |        | 0,000 |
| <b>AR</b>       |        |        | 0,000 |
| <b>ASXL1</b>    |        |        | 0,000 |
| <b>c15orf55</b> |        |        | 0,000 |
| <b>CCND1</b>    |        |        | 0,000 |
| <b>CCND2</b>    |        |        | 0,000 |
| <b>CCNE1</b>    |        |        | 0,000 |
| <b>CDH1</b>     |        |        | 0,000 |
| <b>CDKN2A</b>   |        |        | 0,000 |
| <b>CDKN2B</b>   |        |        | 0,000 |
| <b>DDR2</b>     |        |        | 0,000 |
| <b>EGFR</b>     |        |        | 0,000 |
| <b>EPHA3</b>    |        |        | 0,000 |
| <b>ERBB3</b>    |        |        | 0,000 |
| <b>ERBB4</b>    |        |        | 0,000 |
| <b>ERG</b>      |        |        | 0,000 |
| <b>ESR1</b>     |        |        | 0,000 |
| <b>ETV1</b>     |        |        | 0,000 |
| <b>ETV4</b>     |        |        | 0,000 |
| <b>ETV5</b>     |        |        | 0,000 |
| <b>FGFR2</b>    |        |        | 0,000 |
| <b>IGF1R</b>    |        |        | 0,000 |
| <b>JAK2</b>     |        |        | 0,000 |
| <b>KDR</b>      |        |        | 0,000 |
| <b>MAP3K1</b>   |        |        | 0,000 |
| <b>MAPK1</b>    |        |        | 0,000 |
| <b>MET</b>      |        |        | 0,000 |
| <b>MITF</b>     |        |        | 0,000 |
| <b>MLL</b>      |        |        | 0,000 |
| <b>MPL</b>      |        |        | 0,000 |
| <b>NF2</b>      |        |        | 0,000 |
| <b>NKX2-1</b>   |        |        | 0,000 |
| <b>NOTCH2</b>   |        |        | 0,000 |
| <b>NTRK3</b>    |        |        | 0,000 |
| <b>PDGFRA</b>   |        |        | 0,000 |
| <b>PDGFRB</b>   |        |        | 0,000 |
| <b>RNF43</b>    |        |        | 0,000 |

|                |        |        |        |
|----------------|--------|--------|--------|
| <b>ROS1</b>    |        |        | 0,000  |
| <b>RSP02</b>   |        |        | 0,000  |
| <b>SMO</b>     |        |        | 0,000  |
| <b>SYK</b>     |        |        | 0,000  |
| <b>TMPRSS2</b> |        |        | 0,000  |
| <b>TSC1</b>    |        |        | 0,000  |
| <b>WT1</b>     |        |        | 0,000  |
| <b>TSC2</b>    | -0,334 | 0,328  | -0,003 |
| <b>STK11</b>   | -0,286 | 0,254  | -0,016 |
| <b>MDM2</b>    | 0,202  | -0,242 | -0,020 |
| <b>BRAF</b>    | 0,392  | -0,486 | -0,047 |
| <b>AKT1</b>    | -0,448 | 0,325  | -0,062 |
| <b>PIK3CA</b>  | 0,396  | -0,549 | -0,077 |
| <b>KRAS</b>    | 0,390  | -0,568 | -0,089 |
| <b>FGFR1</b>   |        | -0,204 | -0,102 |
| <b>PTCH1</b>   | -0,206 |        | -0,103 |
| <b>NOTCH1</b>  | -0,219 |        | -0,110 |
| <b>RET</b>     | -0,231 |        | -0,116 |
| <b>TET2</b>    |        | -0,237 | -0,119 |
| <b>AKT3</b>    |        | -0,239 | -0,120 |
| <b>CDKN1B</b>  |        | -0,263 | -0,131 |
| <b>GNA11</b>   | -0,269 |        | -0,135 |
| <b>RHEB</b>    |        | -0,270 | -0,135 |
| <b>CTNNB1</b>  |        | -0,277 | -0,139 |
| <b>JAK3</b>    | -0,302 |        | -0,151 |
| <b>BRD4</b>    | -0,304 |        | -0,152 |
| <b>BRD2</b>    | -0,331 |        | -0,165 |
| <b>ERRFI1</b>  |        | -0,339 | -0,170 |
| <b>FLCN</b>    | -0,359 |        | -0,180 |
| <b>AKT2</b>    | -0,397 |        | -0,198 |
| <b>VHL</b>     |        | -0,400 | -0,200 |
| <b>CCND3</b>   | -0,418 |        | -0,209 |
| <b>MCL1</b>    |        | -0,438 | -0,219 |
| <b>HRAS</b>    | -0,479 |        | -0,240 |
| <b>FBXW7</b>   |        | -0,572 | -0,286 |
| <b>BAP1</b>    | -0,361 | -0,259 | -0,310 |
| <b>MAP2K1</b>  | -0,311 | -0,334 | -0,323 |
| <b>MYD88</b>   | -0,412 | -0,236 | -0,324 |
| <b>MAP2K2</b>  | -0,468 | -0,216 | -0,342 |
| <b>CDKN1A</b>  | -0,411 | -0,346 | -0,379 |
| <b>CREBBP</b>  | -0,221 | -0,587 | -0,404 |
| <b>RAB35</b>   | -0,471 | -0,341 | -0,406 |
| <b>ARAF</b>    | -0,556 | -0,309 | -0,432 |
| <b>NFKBIA</b>  | -0,419 | -0,491 | -0,455 |
| <b>RAF1</b>    | -0,512 | -0,476 | -0,494 |

|              |        |        |        |
|--------------|--------|--------|--------|
| <b>MAPK3</b> | -0,597 | -0,461 | -0,529 |
|--------------|--------|--------|--------|
