# Supplementary material for: High Throughput Fluorescence-Based In Vitro Experimental Platform for the Identification of Effective Therapies to Overcome Tumour Microenvironment-Mediated Drug Resistance in AML
Source: MDPI journal article supplement (doi:10.3390/cancers15071988), 2023-03-27
Supplement: s1 [file s1]

**Supplementary Table S1: Correlation indexes of the co-expression of CRM1 and TARGET genes ( $R > 0.2$ ;  $R < -0.2$ ) with a significant statistically significant value ( $p \leq 0.05$ ) in analysed breast cancer databases.** The column on the right shows the average correlation value of the databases studied.

|                 | Breast cancer |         |         |       |       |         |
|-----------------|---------------|---------|---------|-------|-------|---------|
|                 | Lu            | Ivshina | Pawitan | TCGA  | Wang  | Average |
| <i>EZH2</i>     | 0,288         | 0,233   | 0,293   | 0,473 | 0,408 | 0,339   |
| <i>MSH6</i>     | 0,393         | 0,222   | 0,358   | 0,389 | 0,283 | 0,329   |
| <i>AURKA</i>    | 0,311         |         | 0,318   | 0,417 | 0,335 | 0,276   |
| <i>MSH2</i>     | 0,394         |         | 0,275   | 0,42  | 0,207 | 0,259   |
| <i>ATR</i>      | 0,297         |         | 0,257   |       | 0,387 | 0,188   |
| <i>BRCA2</i>    | 0,308         |         | 0,217   | 0,316 |       | 0,168   |
| <i>CCNE1</i>    | 0,245         |         |         | 0,313 | 0,249 | 0,161   |
| <i>BRCA1</i>    | 0,396         |         |         | 0,366 |       | 0,152   |
| <i>RHEB</i>     |               |         |         | 0,393 | 0,225 | 0,124   |
| <i>DNMT3A</i>   | 0,395         |         |         |       | 0,205 | 0,120   |
| <i>NPM1</i>     |               |         |         | 0,257 | 0,26  | 0,103   |
| <i>NRAS</i>     |               |         |         | 0,225 | 0,256 | 0,096   |
| <i>CREBBP</i>   |               |         |         |       | 0,313 | 0,063   |
| <i>BRAF</i>     |               |         |         | 0,302 |       | 0,060   |
| <i>CDK4</i>     |               |         |         | 0,28  |       | 0,056   |
| <i>KRAS</i>     |               |         |         |       | 0,274 | 0,055   |
| <i>GNAS</i>     | 0,256         |         |         |       |       | 0,051   |
| <i>ALK</i>      | 0,255         |         |         |       |       | 0,051   |
| <i>ASXL1</i>    |               |         | 0,248   |       |       | 0,050   |
| <i>SMAD4</i>    | 0,228         |         |         |       |       | 0,046   |
| <i>FLCN</i>     |               |         | 0,226   |       |       | 0,045   |
| <i>EGFR</i>     | 0,224         |         |         |       |       | 0,045   |
| <i>ETV6</i>     |               |         |         | 0,221 |       | 0,044   |
| <i>ROS1</i>     | 0,221         |         |         |       |       | 0,044   |
| <i>PIK3CB</i>   |               |         |         |       | 0,218 | 0,044   |
| <i>IDH2</i>     |               |         |         | 0,208 |       | 0,042   |
| <i>ERRFI1</i>   |               |         |         | 0,202 |       | 0,040   |
| <i>RAB35</i>    |               |         |         | 0,2   |       | 0,040   |
| <i>ATM</i>      |               |         |         |       |       | 0,000   |
| <i>BAP1</i>     |               |         |         |       |       | 0,000   |
| <i>BCL2</i>     |               |         |         |       |       | 0,000   |
| <i>BRD2</i>     |               |         |         |       |       | 0,000   |
| <i>BRD3</i>     |               |         |         |       |       | 0,000   |
| <i>BRD4</i>     |               |         |         |       |       | 0,000   |
| <i>c15orf55</i> |               |         |         |       |       | 0,000   |
| <i>CCND2</i>    |               |         |         |       |       | 0,000   |
| <i>CCND3</i>    |               |         |         |       |       | 0,000   |
| <i>CDH1</i>     |               |         |         |       |       | 0,000   |
| <i>CDK12</i>    |               |         |         |       |       | 0,000   |
| <i>CDK6</i>     |               |         |         |       |       | 0,000   |
| <i>CDKN1B</i>   |               |         |         |       |       | 0,000   |

|               |       |
|---------------|-------|
| <b>CDKN2A</b> | 0,000 |
|               | 0,000 |
| <b>CDKN2B</b> | 0,000 |
| <b>CRKL</b>   | 0,000 |
| <b>CTNNB1</b> | 0,000 |
| <b>ERBB2</b>  | 0,000 |
| <b>ERBB4</b>  | 0,000 |
| <b>ERCC2</b>  | 0,000 |
| <b>ESR1</b>   | 0,000 |
| <b>ETV4</b>   | 0,000 |
| <b>ETV5</b>   | 0,000 |
| <b>EWSR1</b>  | 0,000 |
| <b>FBXW7</b>  | 0,000 |
| <b>FGFR2</b>  | 0,000 |
| <b>FGFR3</b>  | 0,000 |
| <b>FLT3</b>   | 0,000 |
| <b>GNAQ</b>   | 0,000 |
| <b>HRAS</b>   | 0,000 |
| <b>IDH1</b>   | 0,000 |
| <b>IGF1R</b>  | 0,000 |
| <b>JAK2</b>   | 0,000 |
| <b>JAK3</b>   | 0,000 |
| <b>MAP2K1</b> | 0,000 |
| <b>MAP2K4</b> | 0,000 |
| <b>MAPK1</b>  | 0,000 |
| <b>MCL1</b>   | 0,000 |
| <b>MDM2</b>   | 0,000 |
| <b>MDM4</b>   | 0,000 |
|               | 0,000 |

|                |       |
|----------------|-------|
| <b>MED12</b>   |       |
|                | 0,000 |
| <b>MEN1</b>    |       |
|                | 0,000 |
| <b>MET</b>     |       |
|                | 0,000 |
| <b>MLH1</b>    |       |
|                | 0,000 |
| <b>MLL</b>     |       |
|                | 0,000 |
| <b>MPL</b>     |       |
|                | 0,000 |
| <b>MTOR</b>    |       |
|                | 0,000 |
| <b>MYC</b>     |       |
|                | 0,000 |
| <b>MYD88</b>   |       |
|                | 0,000 |
| <b>NF1</b>     |       |
|                | 0,000 |
| <b>NFKBIA</b>  |       |
|                | 0,000 |
| <b>NKX2-1</b>  |       |
|                | 0,000 |
| <b>NOTCH1</b>  |       |
|                | 0,000 |
| <b>NOTCH2</b>  |       |
|                | 0,000 |
| <b>NTRK3</b>   |       |
|                | 0,000 |
| <b>PIK3CA</b>  |       |
|                | 0,000 |
| <b>PTCH1</b>   |       |
|                | 0,000 |
| <b>RAF1</b>    |       |
|                | 0,000 |
| <b>RARA</b>    |       |
|                | 0,000 |
| <b>RB1</b>     |       |
|                |       |
| <b>RET</b>     | 0,000 |
| <b>RNF43</b>   | 0,000 |
| <b>RSPO2</b>   | 0,000 |
| <b>SMAD2</b>   | 0,000 |
| <b>SMARCA4</b> | 0,000 |
| <b>SMARCB1</b> | 0,000 |
| <b>SMO</b>     | 0,000 |
| <b>STK11</b>   | 0,000 |
| <b>SYK</b>     | 0,000 |
| <b>TET2</b>    | 0,000 |
| <b>TMPRSS2</b> | 0,000 |
| <b>TP53</b>    | 0,000 |

|               |        |        |        |
|---------------|--------|--------|--------|
| <b>TSC1</b>   |        |        | 0,000  |
| <b>WT1</b>    |        |        | 0,000  |
| <b>ZNRF3</b>  |        |        | 0,000  |
| <b>CEBPA</b>  |        |        | -0,040 |
|               |        | -0,202 |        |
| <b>ABL1</b>   |        |        | -0,041 |
|               | -0,203 |        |        |
| <b>ERBB3</b>  |        |        | -0,041 |
|               |        | -0,205 |        |
| <b>PIK3R1</b> |        |        | -0,042 |
|               | -0,21  |        |        |
| <b>AKT2</b>   |        |        | -0,042 |
|               |        | -0,211 |        |
| <b>NF2</b>    |        |        | -0,042 |
|               | -0,212 |        |        |
| <b>TSC2</b>   |        |        | -0,042 |
|               |        | -0,212 |        |
| <b>AR</b>     |        | -0,218 | -0,044 |
| <b>KDR</b>    |        |        | -0,044 |
|               |        | -0,222 |        |
| <b>VHL</b>    |        |        | -0,045 |
|               | -0,224 |        |        |
| <b>PTEN</b>   |        |        | -0,046 |
|               | -0,23  |        |        |
| <b>RUNX1</b>  |        |        | -0,046 |
|               |        | -0,23  |        |
| <b>FGFR1</b>  |        | -0,241 | -0,048 |
| <b>ETV1</b>   |        | -0,255 | -0,051 |
| <b>MAPK3</b>  |        |        | -0,052 |
|               | -0,259 |        |        |
| <b>KIT</b>    |        |        | -0,052 |
|               | -0,261 |        |        |
| <b>EPHA3</b>  |        |        | -0,054 |
|               |        | -0,27  |        |
| <b>APC</b>    |        | -0,275 | -0,055 |
| <b>MAP2K2</b> |        |        | -0,056 |
|               |        | -0,278 |        |
| <b>PDGFRA</b> |        |        | -0,057 |
|               |        | -0,287 |        |
| <b>AKT3</b>   |        | -0,304 | -0,061 |
| <b>MAP3K1</b> |        |        | -0,062 |
|               | -0,31  |        |        |
| <b>GNA11</b>  |        |        | -0,099 |
|               | -0,25  | -0,247 |        |
| <b>AKT1</b>   |        |        | -0,103 |
|               |        | -0,282 | -0,233 |
| <b>ERG</b>    |        |        | -0,104 |
|               | -0,229 | -0,289 |        |
| <b>ARAF</b>   |        | -0,228 | -0,126 |
|               |        | -0,402 |        |
| <b>CDKN1A</b> |        |        | -0,143 |
|               | -0,282 | -0,434 |        |
| <b>DDR2</b>   | -0,271 |        | -0,154 |

|               |       |        |        |        |        |
|---------------|-------|--------|--------|--------|--------|
|               |       | -0,229 |        | -0,269 |        |
| <b>CCND1</b>  |       | -0,258 |        | -0,287 | -0,156 |
|               |       |        | -0,233 |        |        |
| <b>MITF</b>   |       | -0,214 | -0,255 |        | -0,172 |
|               | -0,19 |        |        | -0,203 |        |
| <b>PDGFRB</b> |       | -0,257 | -0,287 | -0,245 | -0,216 |
|               |       |        | -0,289 |        |        |
